# Supplementary material for: Chemical Characterisation, Antidiabetic, Antibacterial, and In Silico Studies for Different Extracts of Haloxylon stocksii (Boiss.) Benth: A Promising Halophyte
Source: MDPI journal article supplement (doi:10.3390/molecules28093847), 2023-05-01
Supplement: s1 [file s1]

Supplementary file

# Chemical Characterisation, Antidiabetic, Antibacterial, and In silico Studies for Different Extracts of *Haloxylon stocksii* (Boiss.) Benth: A Promising Halophyte

Syed Nabil Raza Rizvi <sup>1</sup>, Samina Afzal <sup>1,\*</sup>, Kashif-ur-Rehman Khan <sup>2,\*</sup>, Hanan Y. Aati <sup>3</sup>, Huma Rao <sup>2</sup>, Bilal Ahmad Ghalloo <sup>2,4</sup>, Muhammad Nadeem Shahzad <sup>2</sup>, Duraiz Ahmed Khan <sup>2</sup>, Tuba Esatbeyoglu <sup>5,\*</sup> and Sameh A. Korma <sup>6,7</sup>

<sup>1</sup> Department of Pharmaceutical Chemistry, Faculty of Pharmacy, Bahauddin Zakariya University, Multan 60000, Pakistan

<sup>2</sup> Department of Pharmaceutical Chemistry, Faculty of Pharmacy, The Islamia University of Bahawalpur, Bahawalpur 63100, Pakistan;

<sup>3</sup> Department of Pharmacognosy, College of Pharmacy, King Saud University, Riyadh 11495, Saudi Arabia

<sup>4</sup> Department of Medicinal Chemistry, College of Pharmacy, University of Minnesota, Minneapolis, MN 55454, USA

<sup>5</sup> Department of Food Development and Food Quality, Institute of Food Science and Human Nutrition, Gottfried Wilhelm Leibniz University Hannover, Am Kleinen Felde 30, 30167 Hannover, Germany

<sup>6</sup> Department of Food Science, Faculty of Agriculture, Zagazig University, Zagazig 44519, Egypt

<sup>7</sup> School of Food Science and Engineering, South China University of Technology, Guangzhou 510641, China

\* Correspondence: samina.afzal@bzu.edu.pk (S.A.); [esatbeyoglu@lw.uni-hannover.de](mailto:esatbeyoglu@lw.uni-hannover.de) (T.E.)

**Table S1:** Safety Profile of LC-MS identified compound

| Compound Name                                          | Toxicity profile                                                                                       |
|--------------------------------------------------------|--------------------------------------------------------------------------------------------------------|
| N-Methyltyramine                                       | LD <sub>50</sub> = 780 mg/kg (Intraperitoneal)<br>LD <sub>50</sub> = 275 mg/kg (Intravenous)           |
| Acetophenone                                           | Safe, Hypnosis occur at 0.4 to 0.5 g/kg (Intravenous)                                                  |
| Hordenine                                              | Harmful if swallowed, skin sensitization                                                               |
| Fraxetin                                               | NA                                                                                                     |
| 6,8-dihydroxy-7-methoxy-3-methyl-1H-isochromen-1-one   | NA                                                                                                     |
| Nor-3-methylfentanyl                                   | NA                                                                                                     |
| Moupinamide                                            | Very toxic to aquatic life                                                                             |
| 2-(2,6-dimethoxyphenyl)-5,6-dimethoxy-4H-chromen-4-one | NA                                                                                                     |
| Piperine                                               | LD <sub>50</sub> = 34 mg/kg (Rats, Intraperitoneal)<br>LD <sub>50</sub> = 71 mg/kg (Mice, Intravenous) |
| Tris(2-butoxyethyl) phosphate                          | No skin sensitization                                                                                  |
| Acetyl tributyl citrate                                | No skin sensitization                                                                                  |
| Hexadecanamide                                         | May cause irritation                                                                                   |
| 1-Palmitoylglycerol                                    | May cause irritation                                                                                   |
| (1S)-Tricyclo[7.3.1.0~2,7~]tridec-2(7)-en-13-one       | NA                                                                                                     |
| Stearamide                                             | Cough and redness to the skin                                                                          |
| Erucamide                                              | Myocardial granulomas, necrosis, and lesions                                                           |
| N,N-Dimethylaniline                                    | LD <sub>50</sub> = 50 mg/kg (Oral)                                                                     |

“NA” No toxicity data is available in <https://pubchem.ncbi.nlm.nih.gov/> database.

**Table S2:**  $\alpha$ -amylase inhibition and  $\alpha$ -glucosidase inhibition of *Haloxylon stocksii*

| Sample Name | $\alpha$ -amylase inhibition | $\alpha$ -glucosidase inhibition |
|-------------|------------------------------|----------------------------------|
| AMHS        | 65.78±3.19 <sup>b</sup>      | 59.91±4.16 <sup>b</sup>          |
| ADHS        | 42.64±1.62 <sup>d</sup>      | 38.03±2.25 <sup>d</sup>          |
| RMHS        | 58.82±2.92 <sup>c</sup>      | 53.41±5.64 <sup>c</sup>          |
| RDHS        | 44.47±1.22 <sup>d</sup>      | 32.50±0.85 <sup>e</sup>          |
| Acarbose    | 79.58±4.28 <sup>a</sup>      | 74.27±6.66 <sup>a</sup>          |

“AMHS” aerial parts methanolic *H. stocksii* extract, “ADHS” Aerial parts dichloromethane *H. stocksii* extract, “RMHS” roots methanolic *H. stocksii* extract, and “RDHS” roots dichloromethane *H. stocksii* extract; the superscripts a, b, c, d, and e represent significant difference ( $p < 0.05$ )

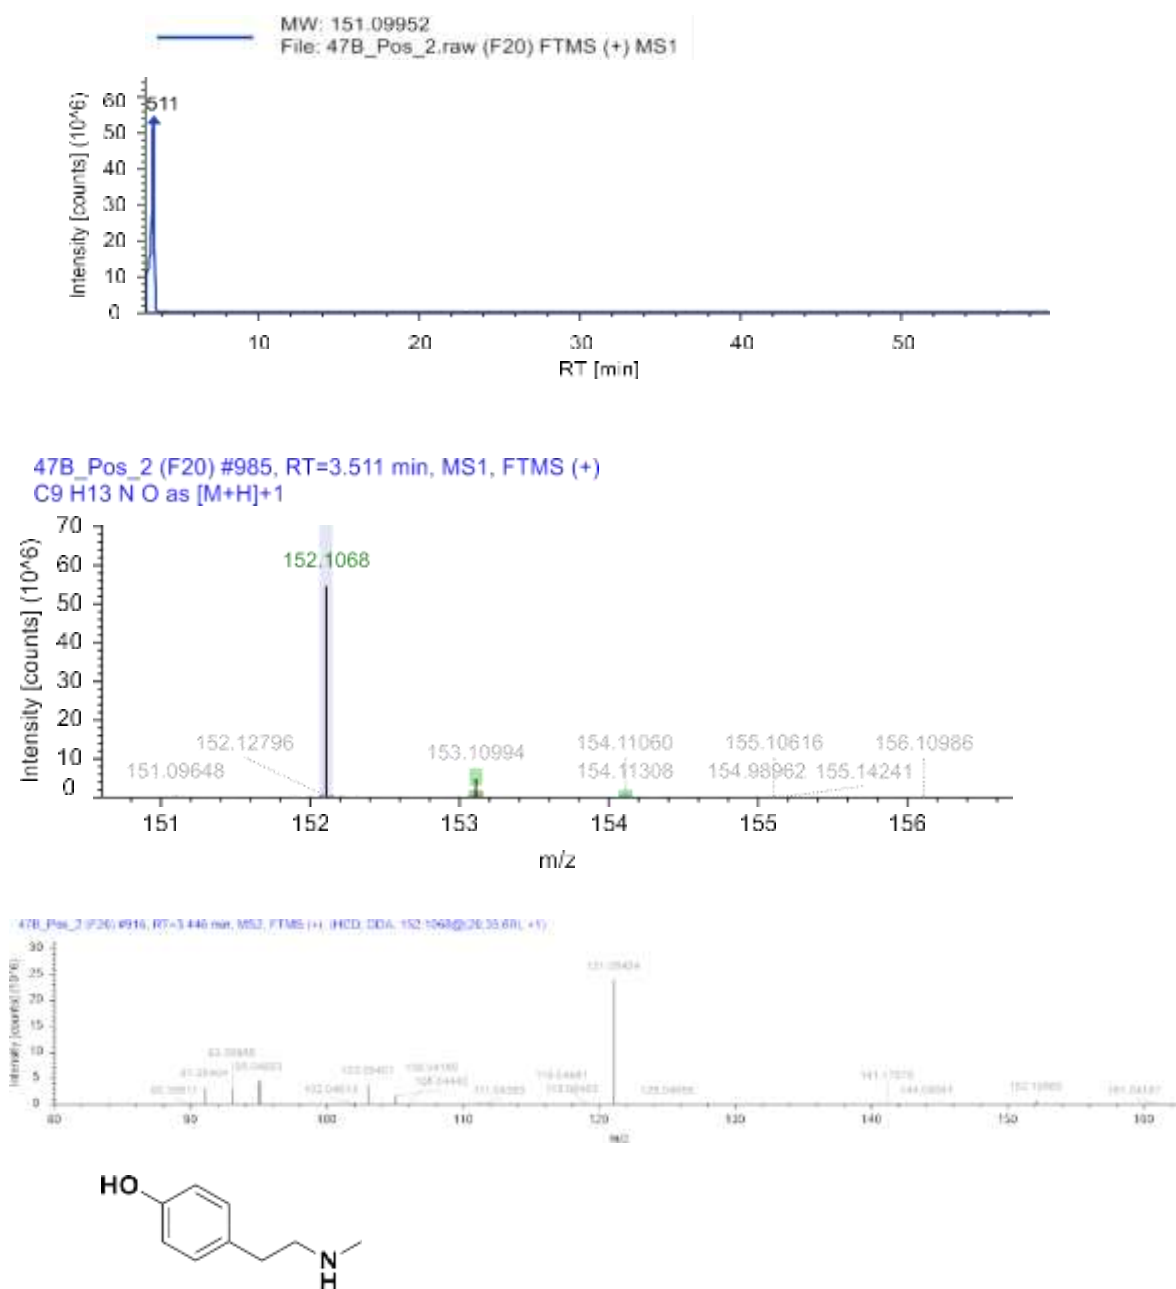

Figure S1: Retention time peak, fragmentation pattern and chemical structure of N-Methyltyramine

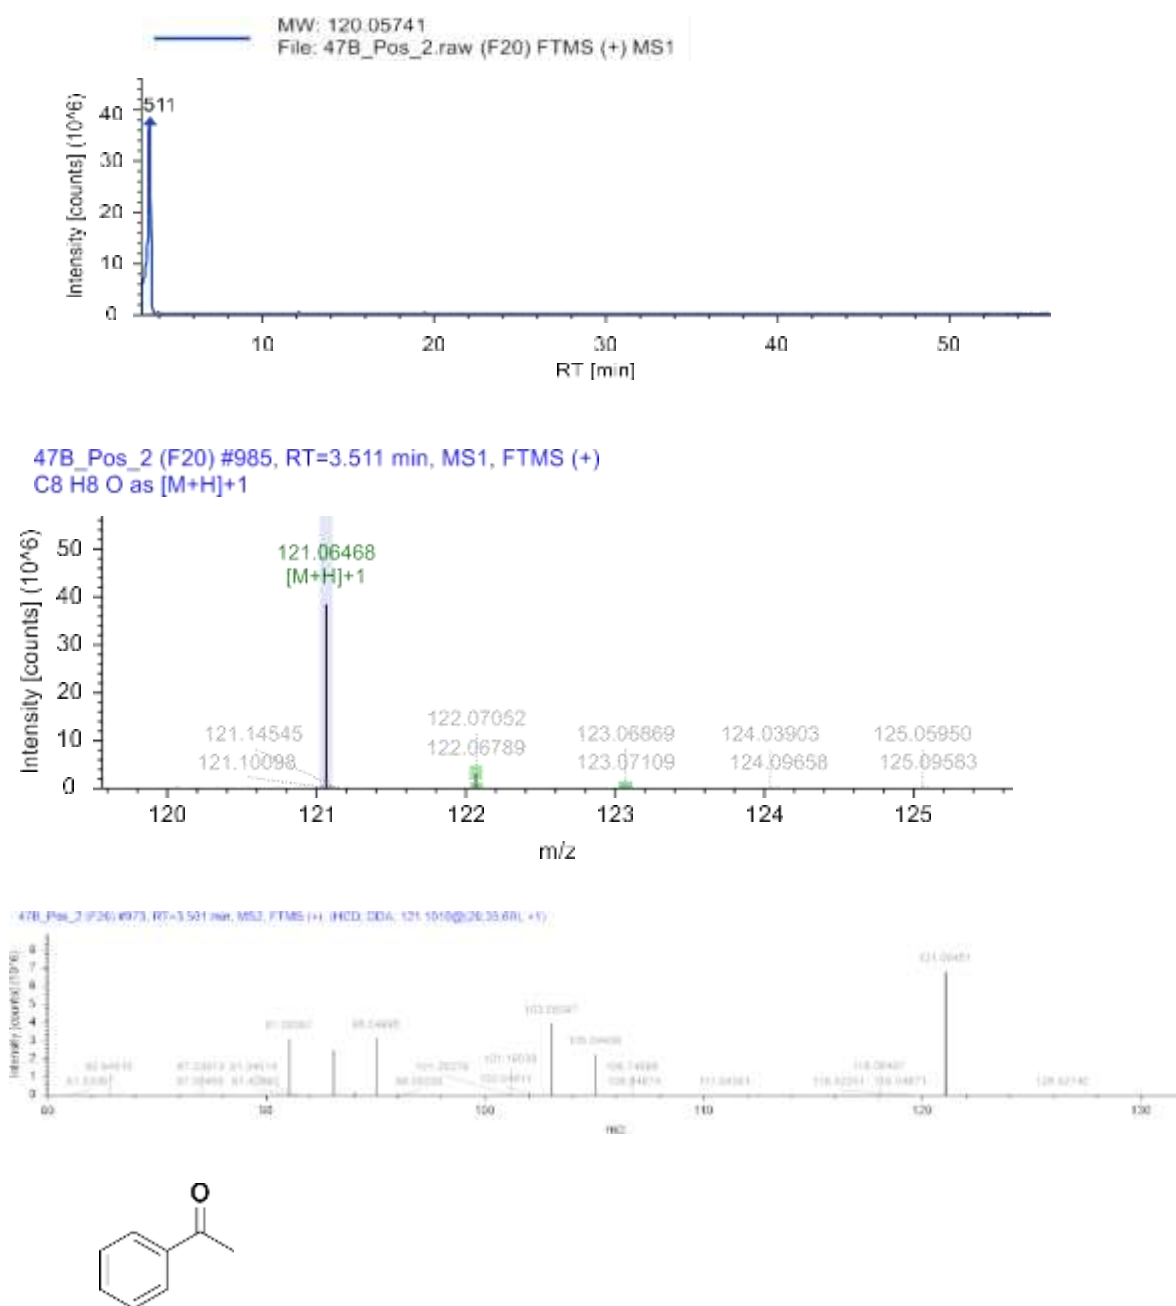

**Figure S2:** Retention time peak, fragmentation pattern and chemical structure of Acetophenone

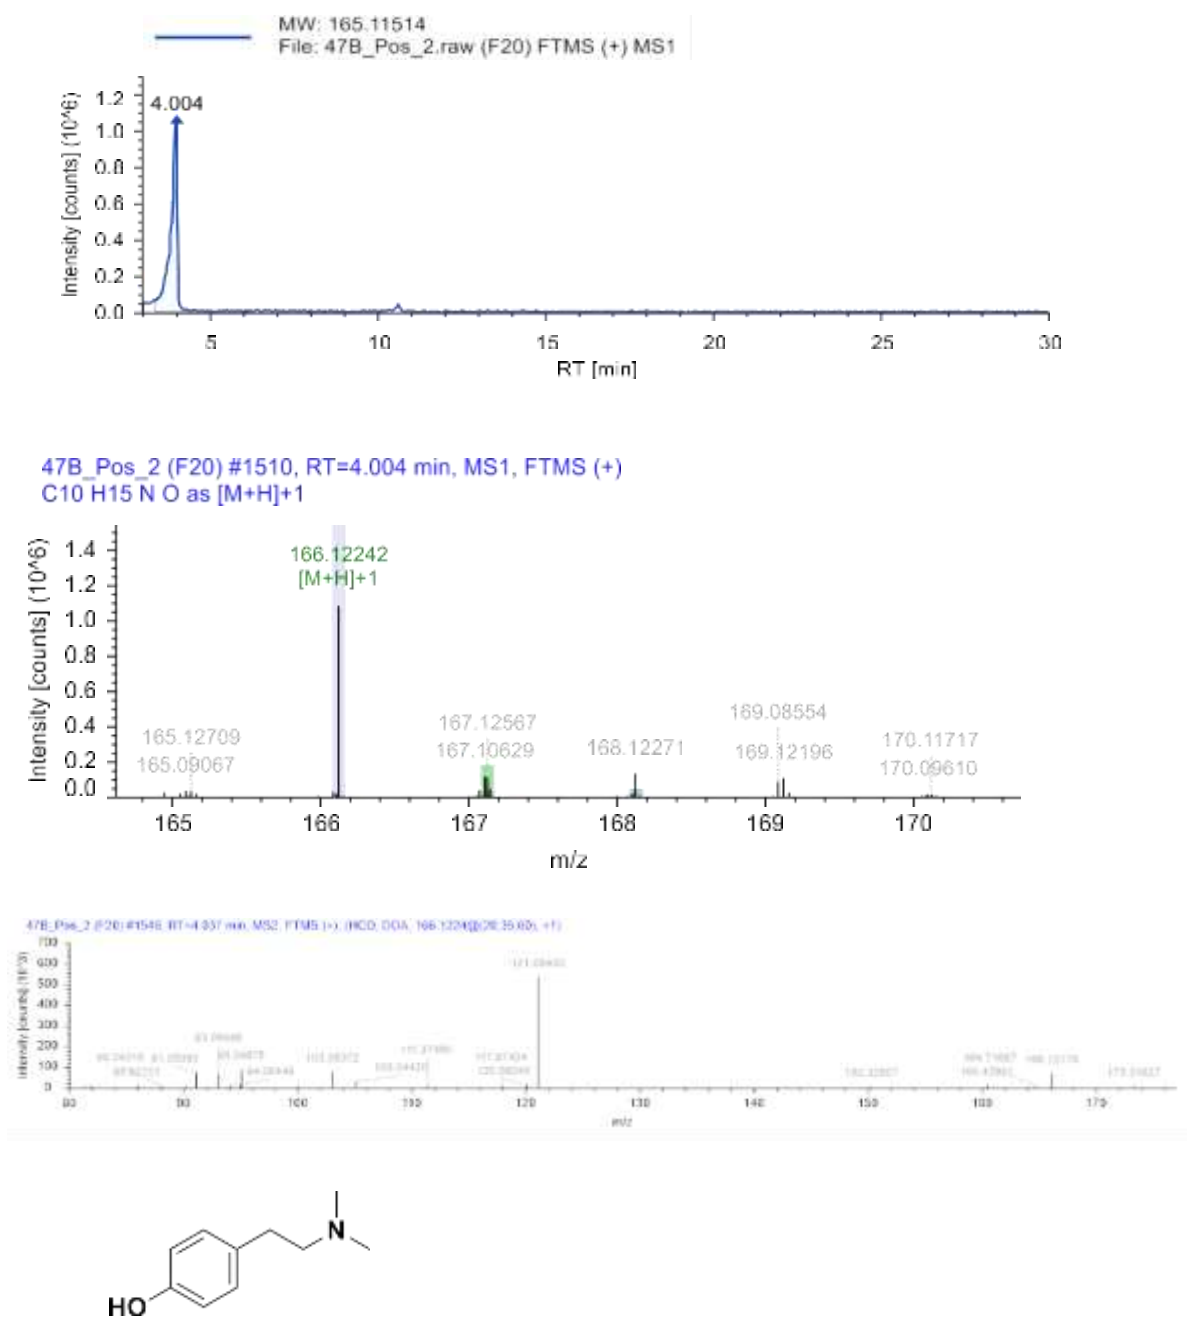

**Figure S3:** Retention time peak, fragmentation pattern and chemical structure of Hordenine

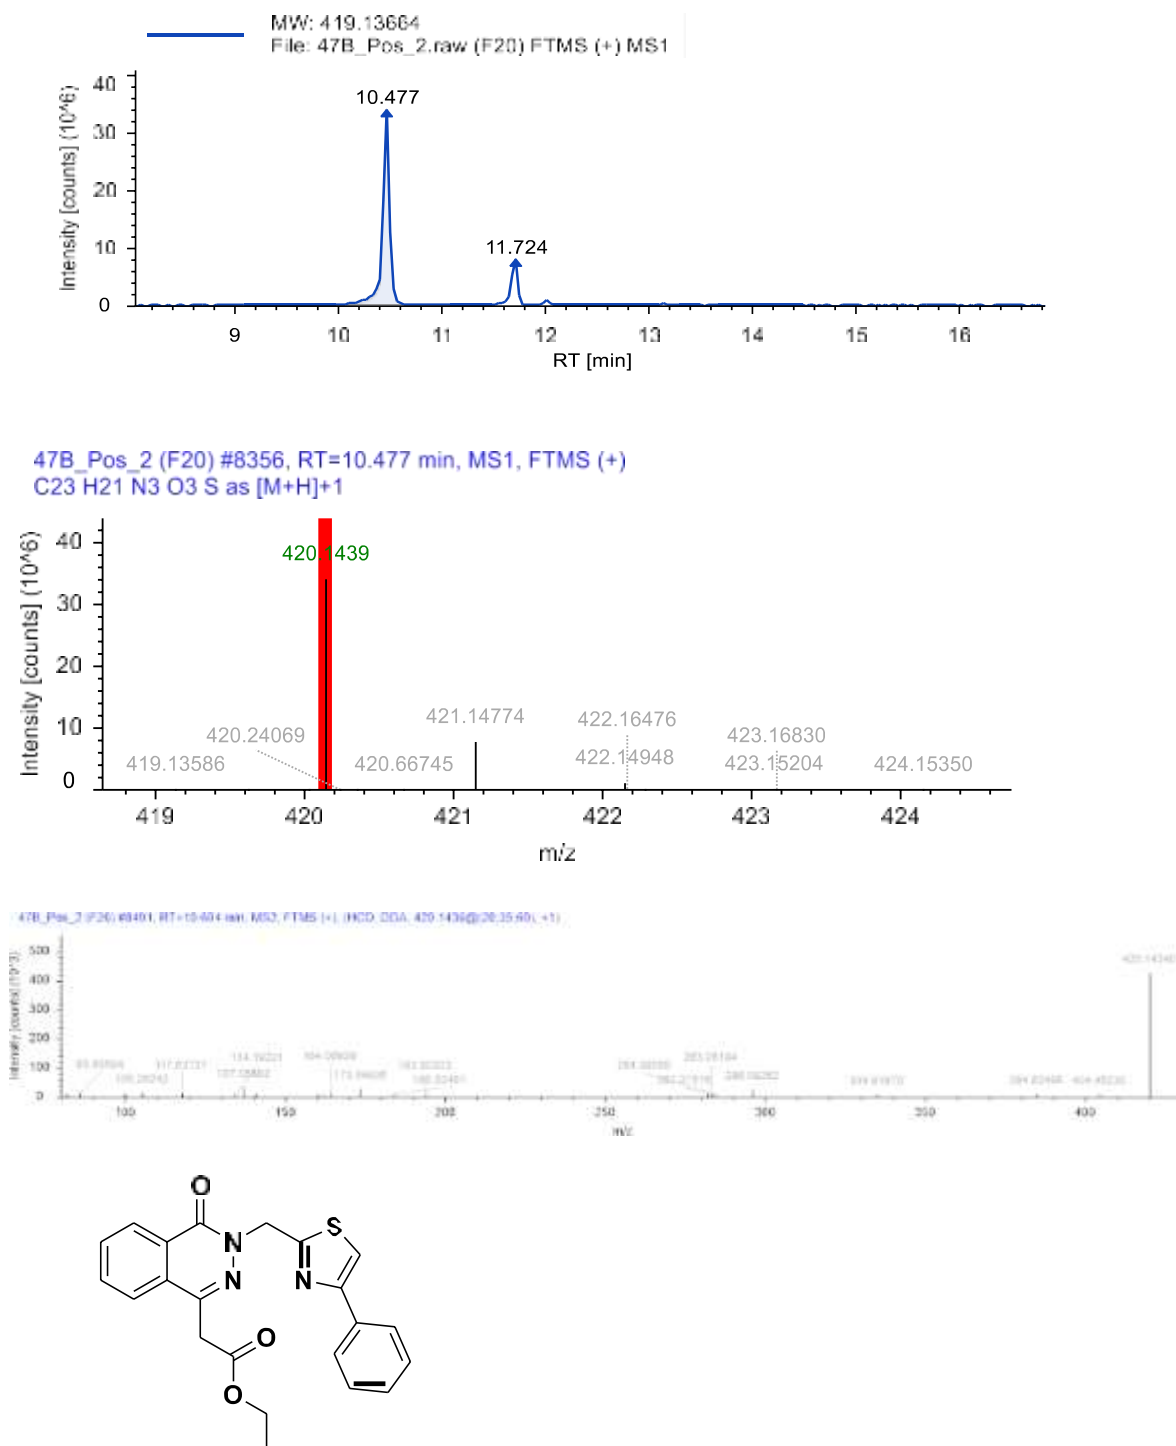

**Figure S4:** Retention time peak, fragmentation pattern and chemical structure of Ethyl 2-(3-([4-(4-methylphenyl)-1,3-thiazol-2-yl]methyl)-4-oxo-3,4-dihydrophthalazin-1-yl)acetate

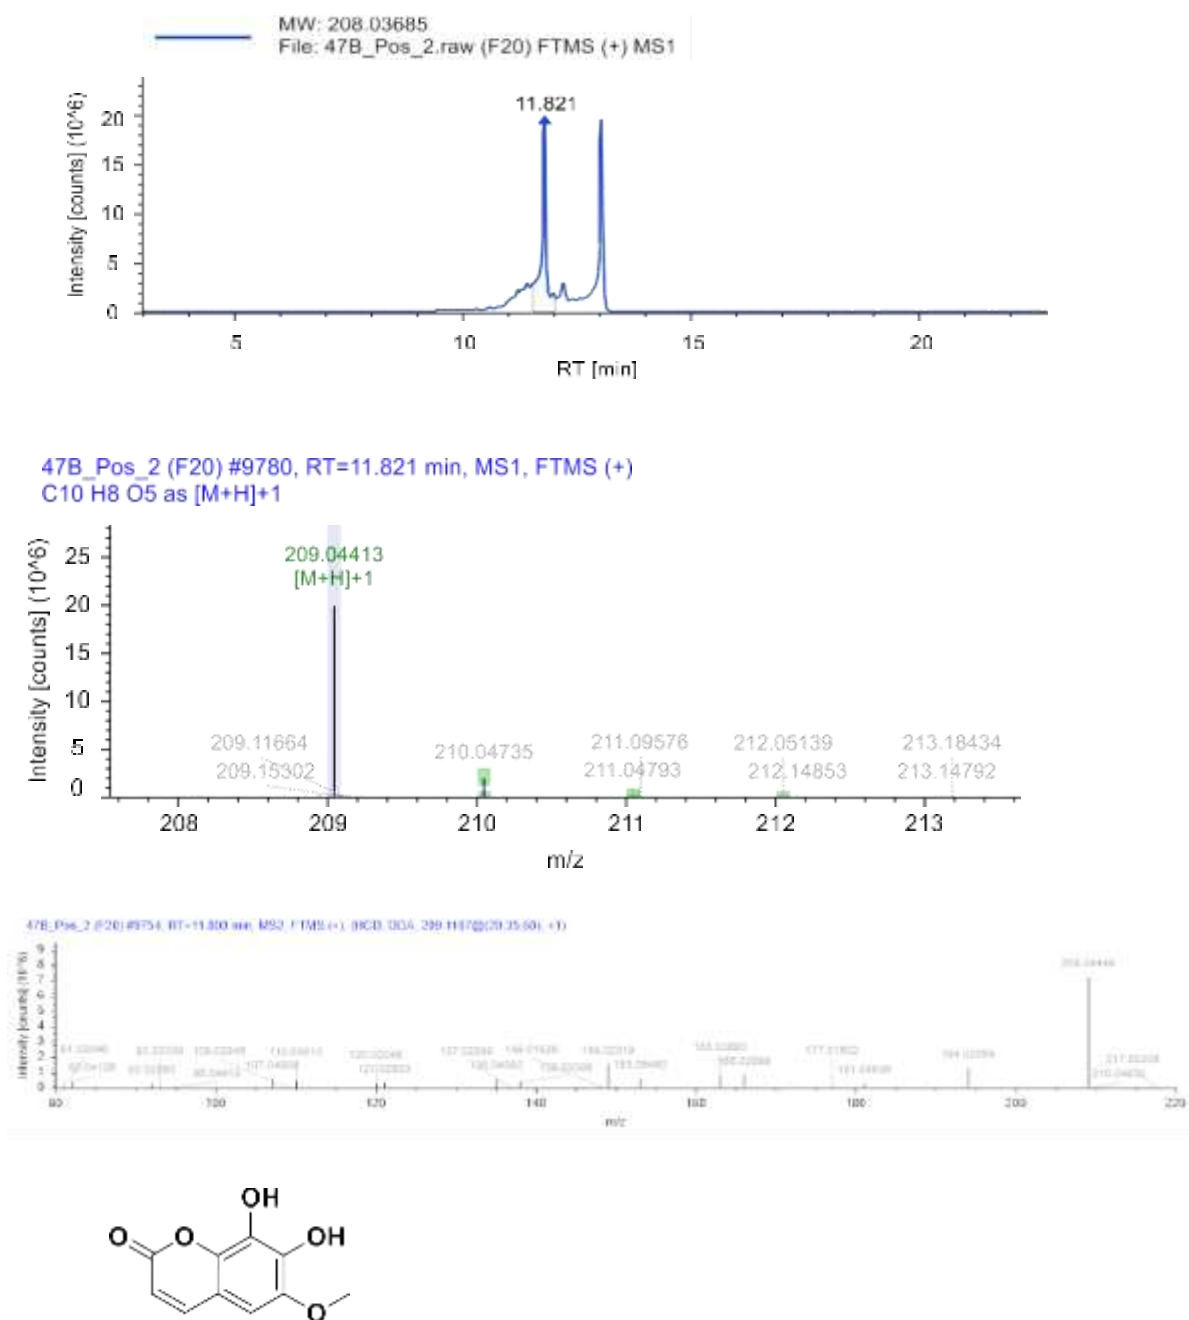

**Figure S5:** Retention time peak, fragmentation pattern and chemical structure of Fraxetin

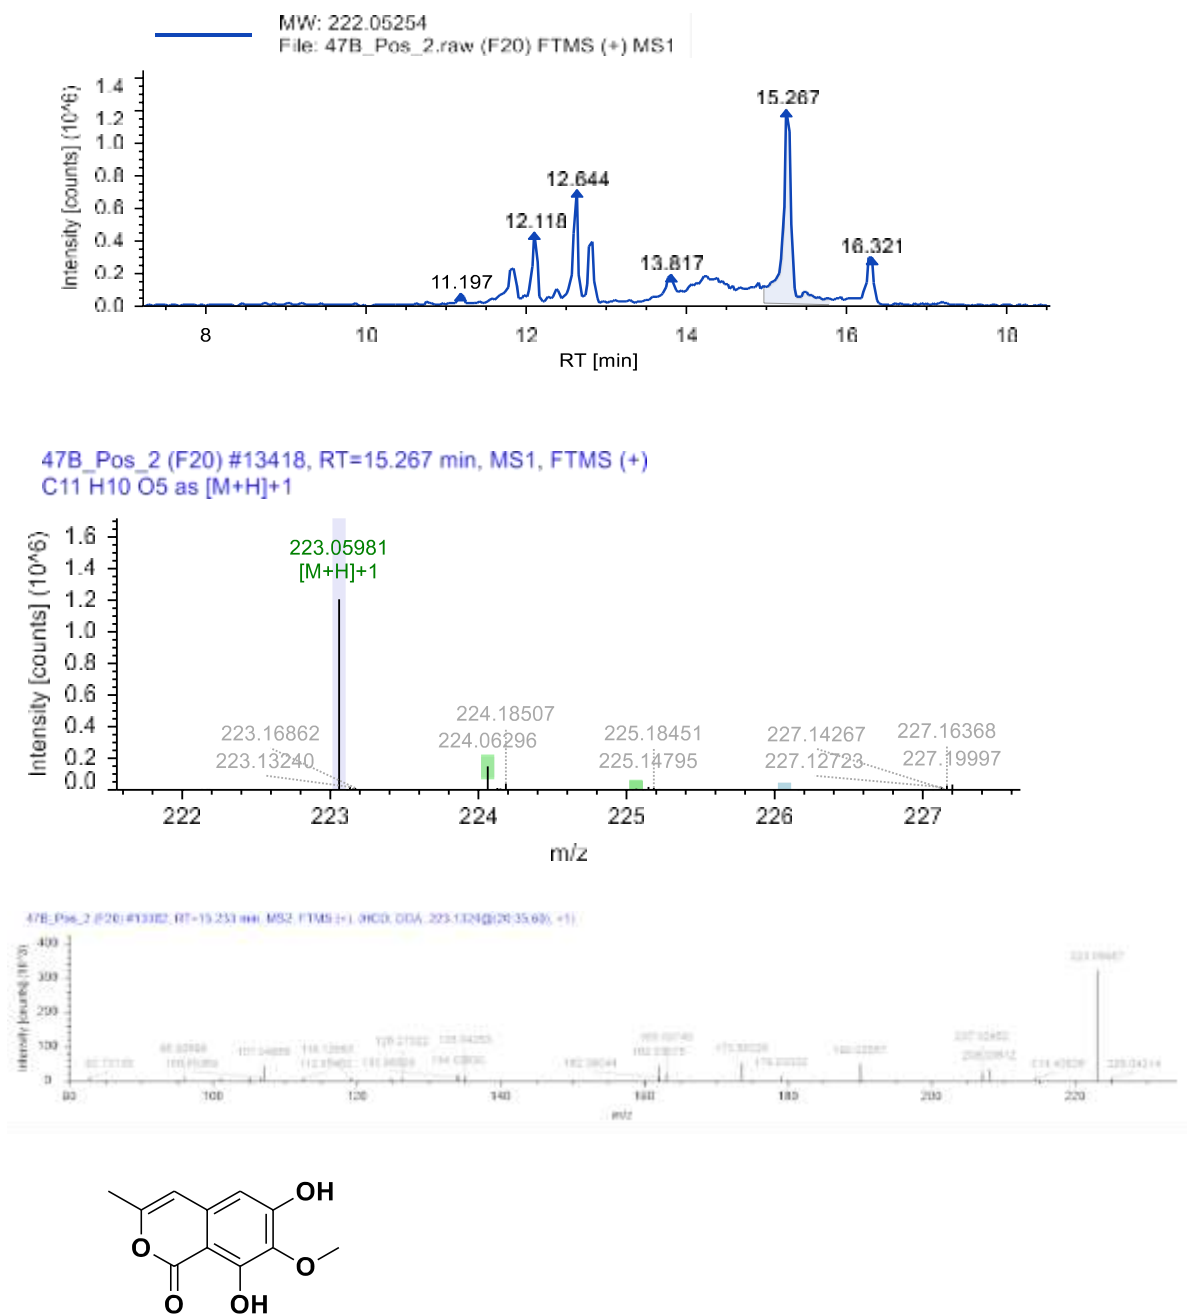

**Figure S6:** Retention time peak, fragmentation pattern and chemical structure of 6,8-dihydroxy-7-methoxy-3-methyl-1H-isochromen-1-one



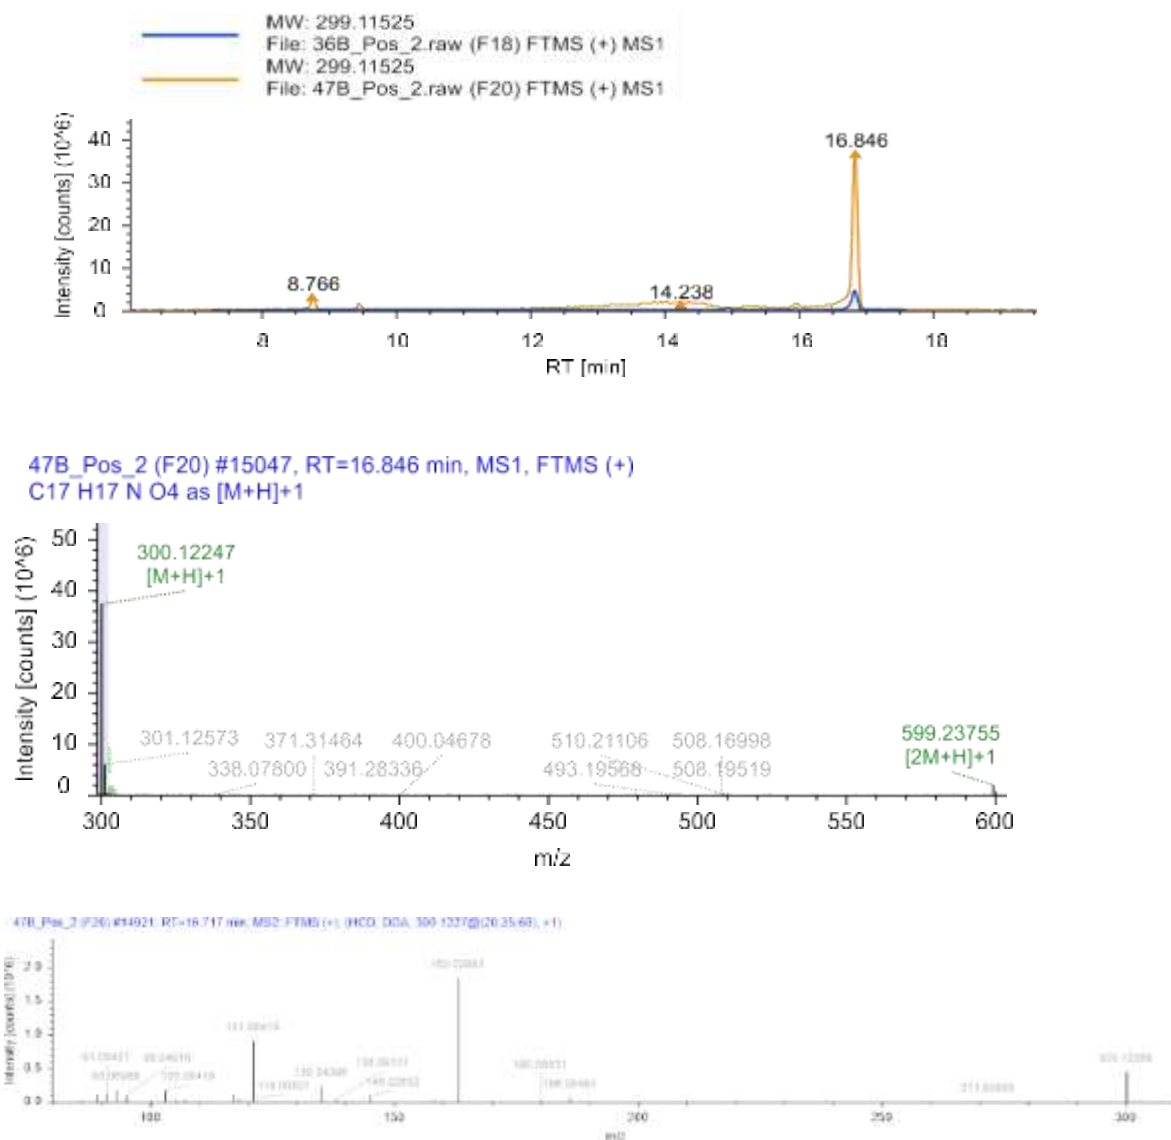

Figure S7: Retention time peak, and fragmentation pattern of Unknown compound (not identified with library)

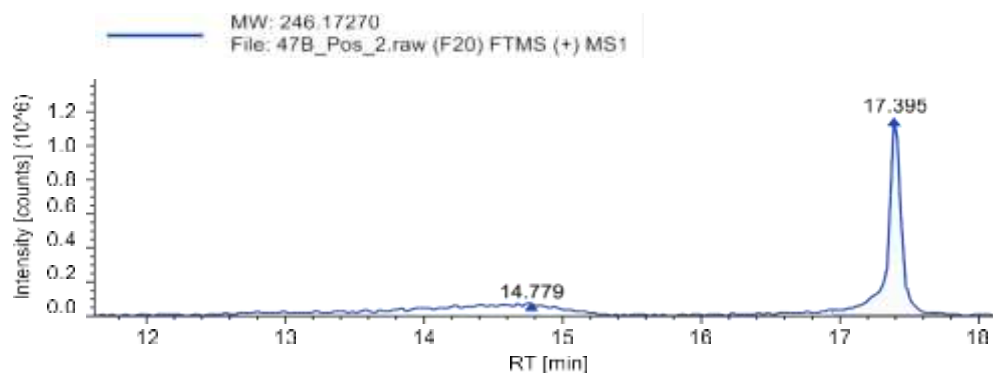

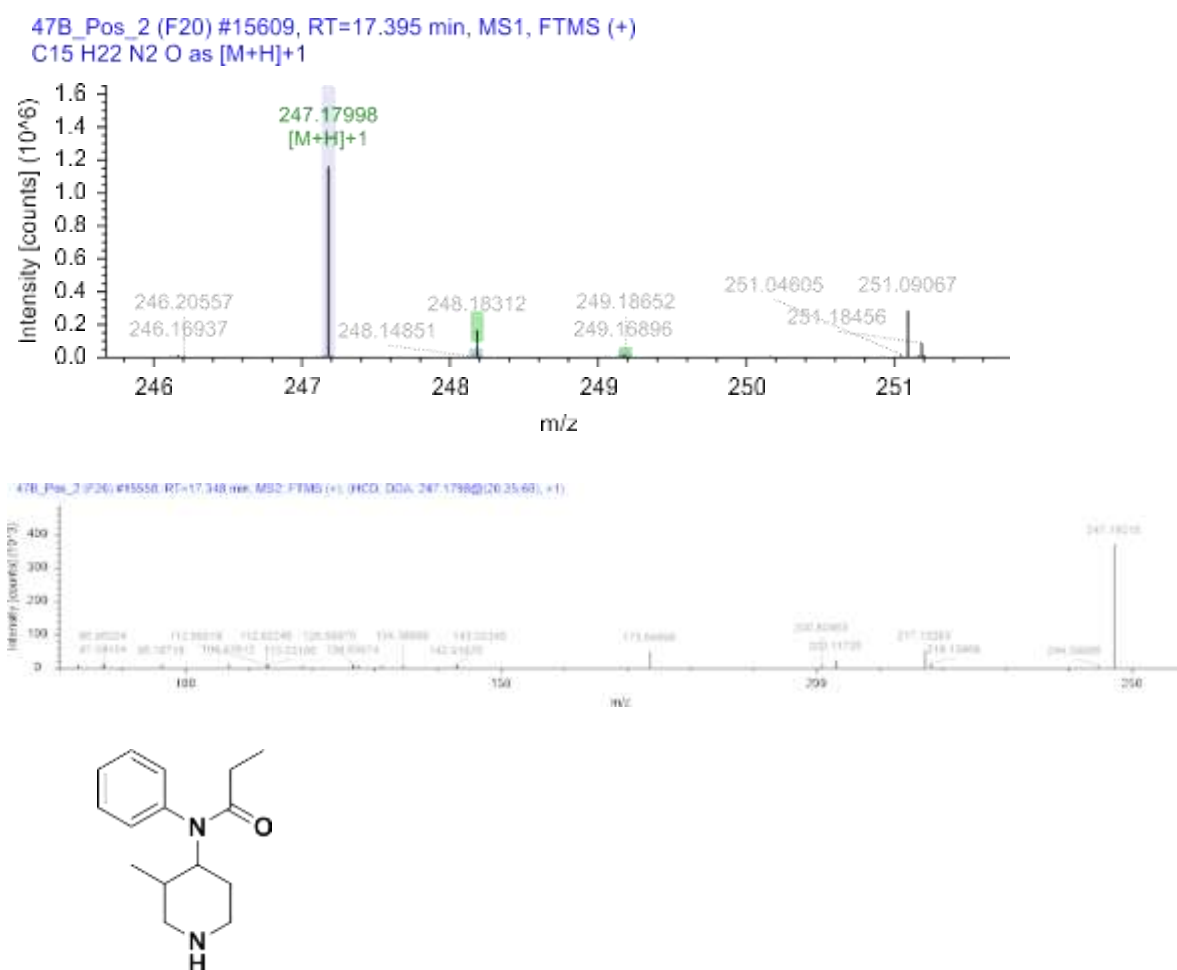

**Figure S8:** Retention time peak, fragmentation pattern and chemical structure of nor -3-methylfentanyl

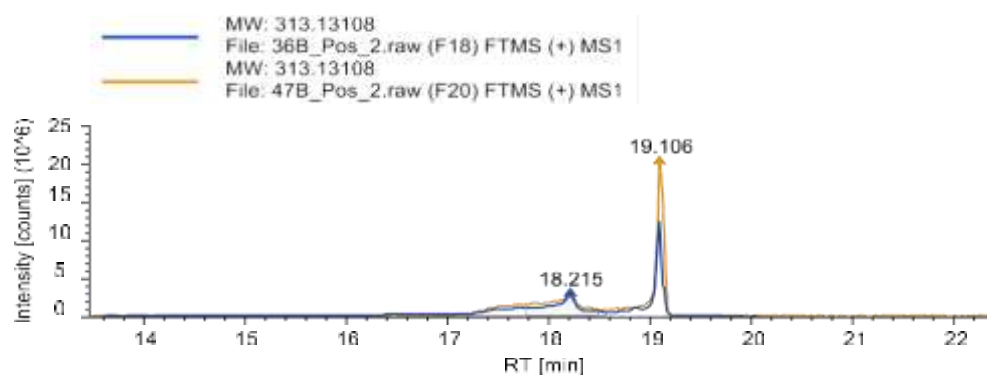

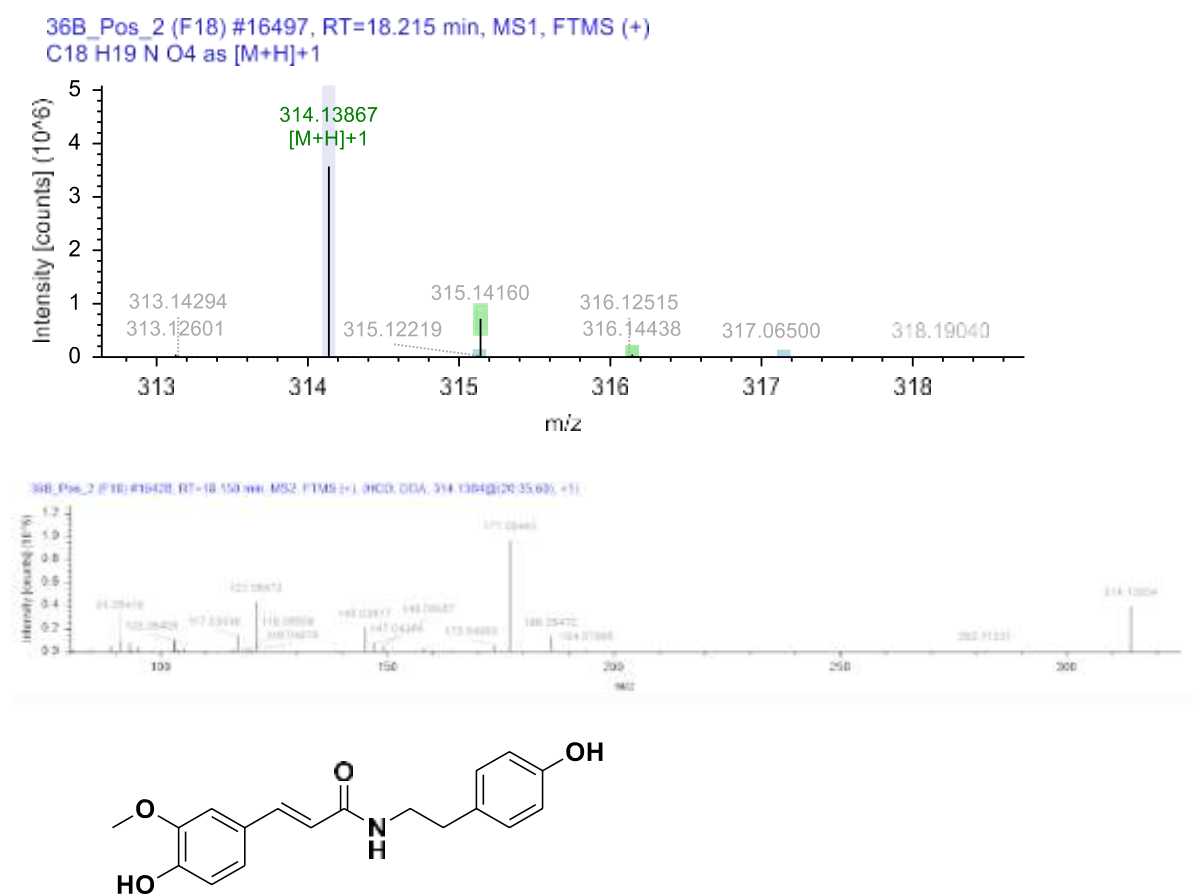

Figure S9: Retention time peak, fragmentation pattern and chemical structure of Moupinamide

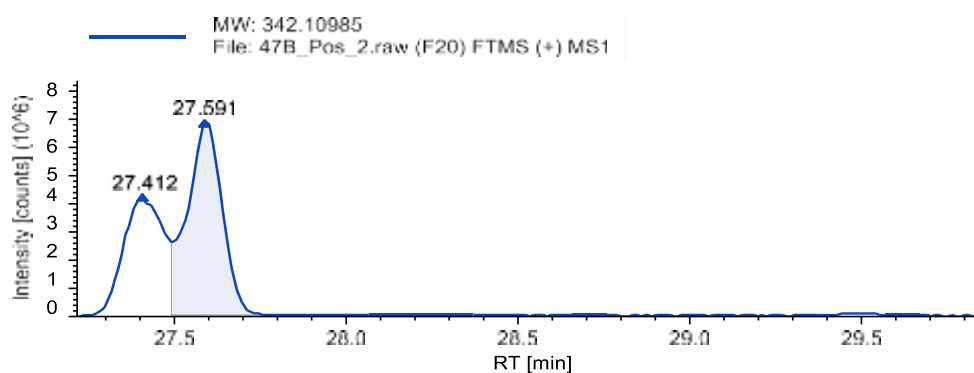

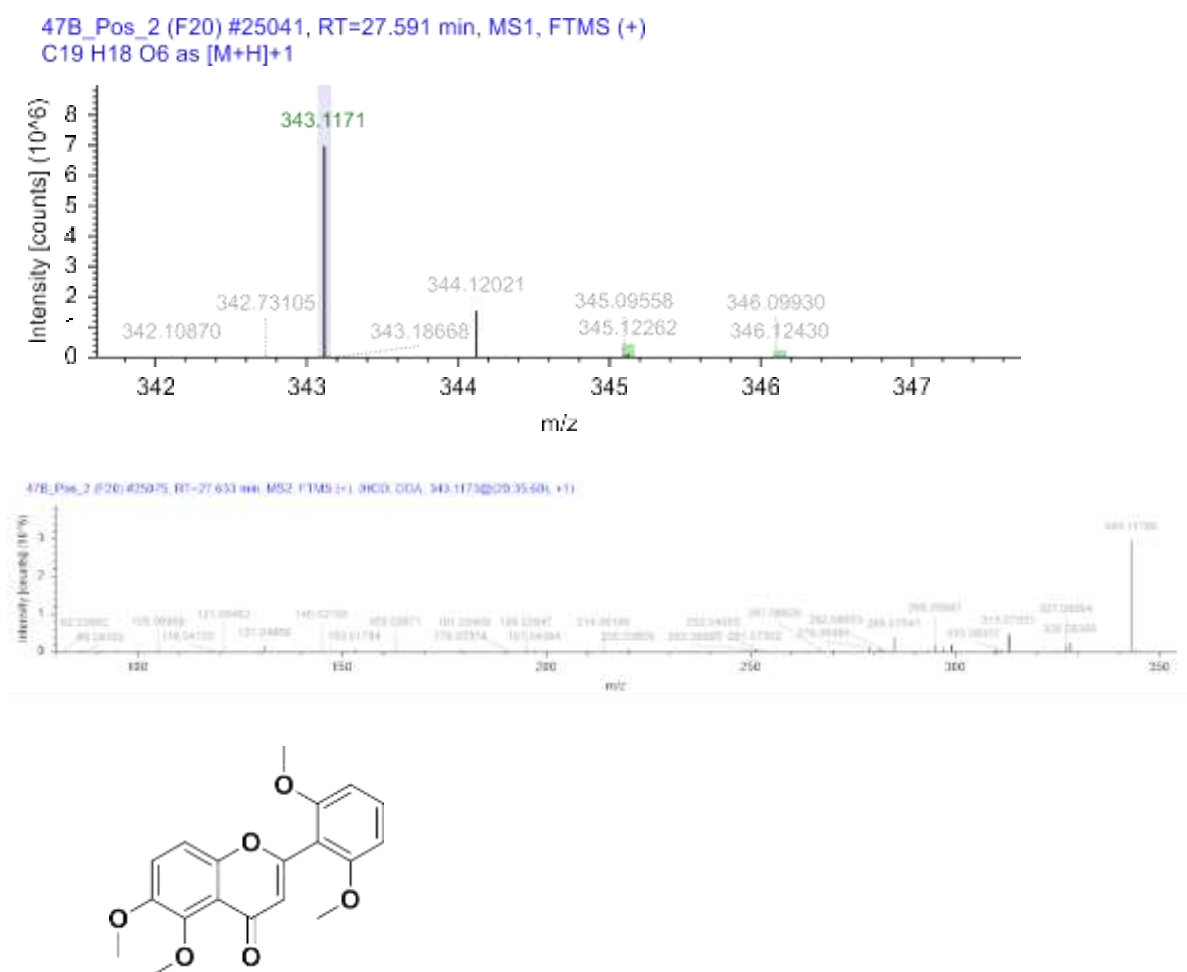

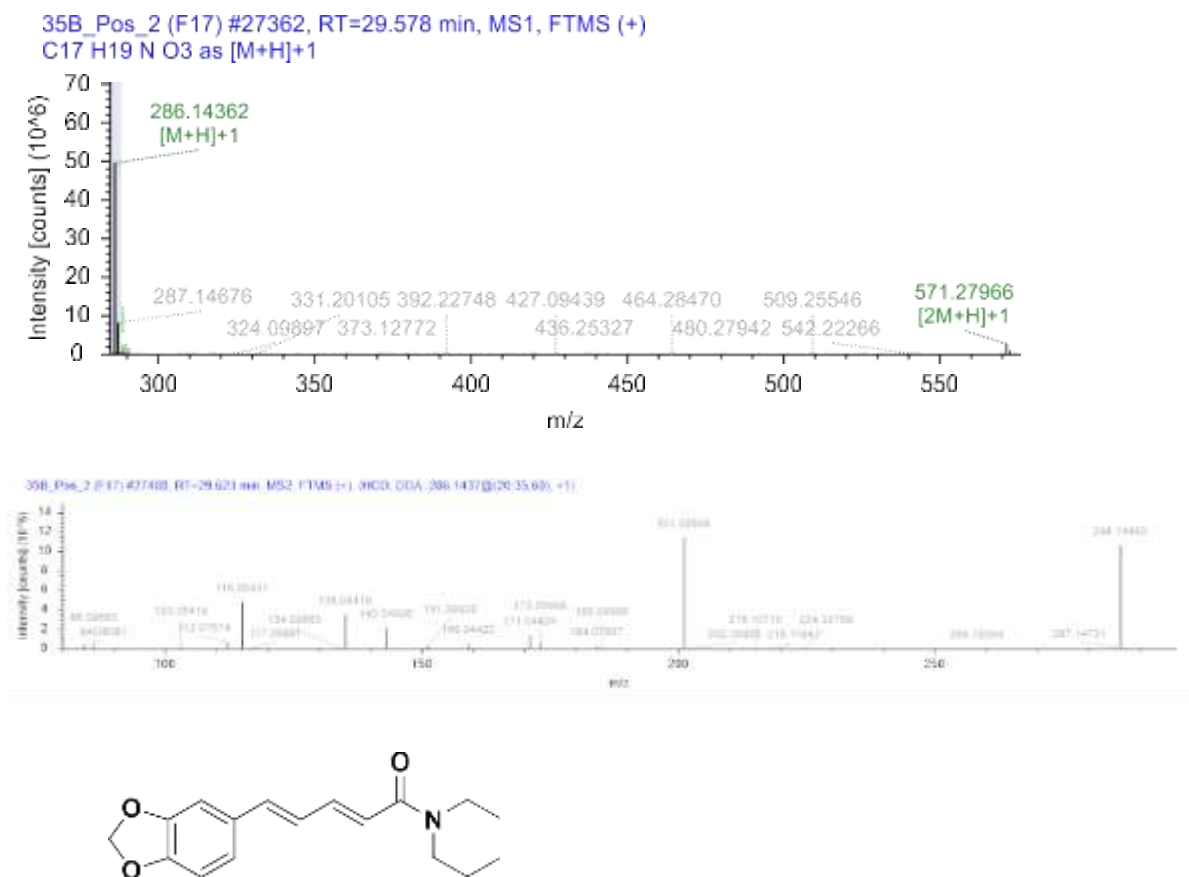

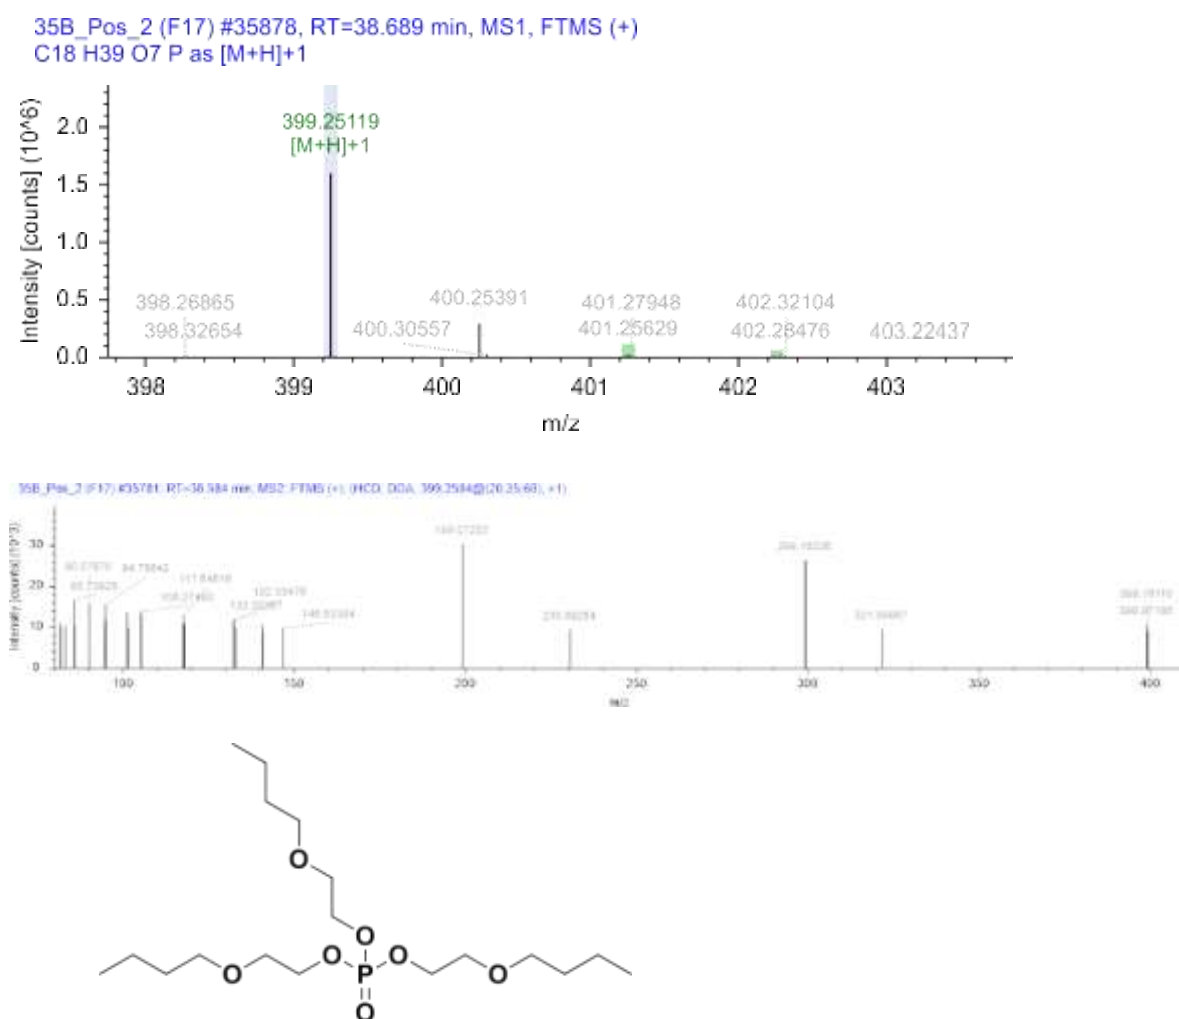

**Figure S12:** Retention time peak, fragmentation pattern and chemical structure of tris(2-Butoxyethyl) phosphate

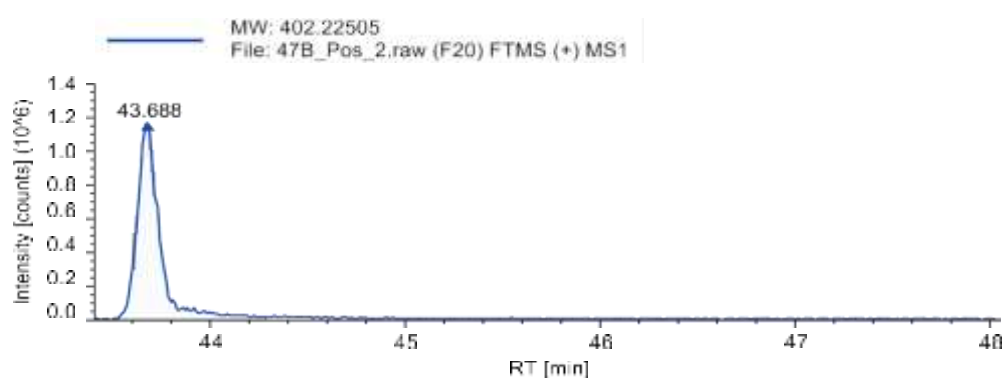

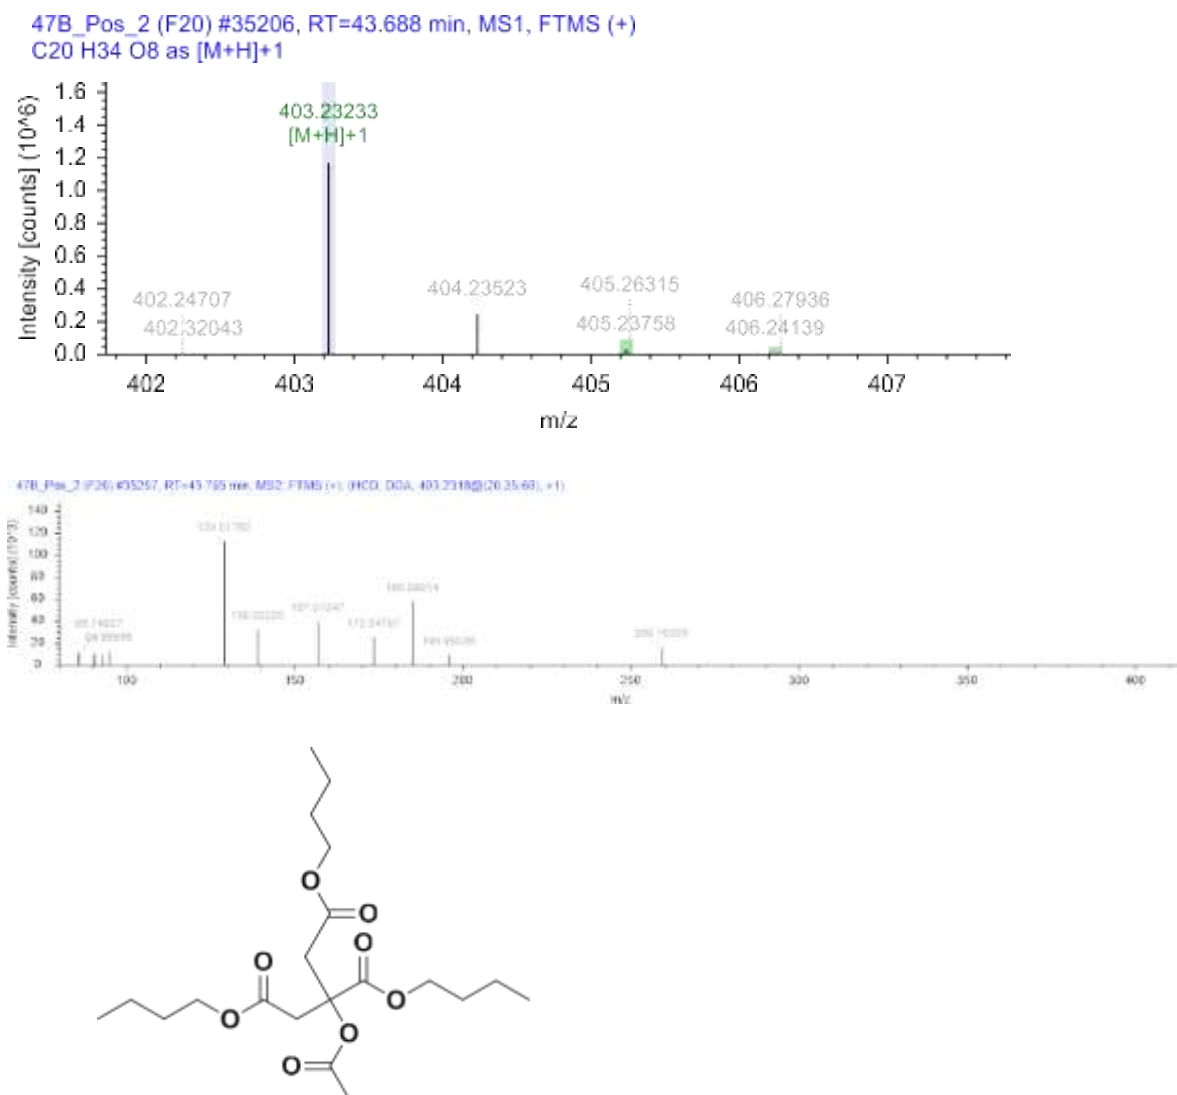

**Figure S13:** Retention time peak, fragmentation pattern and chemical structure of Acetyl tributyl citrate

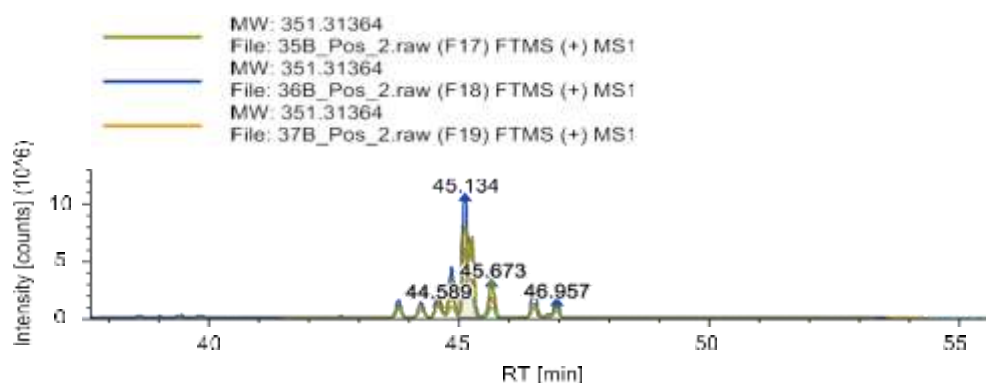

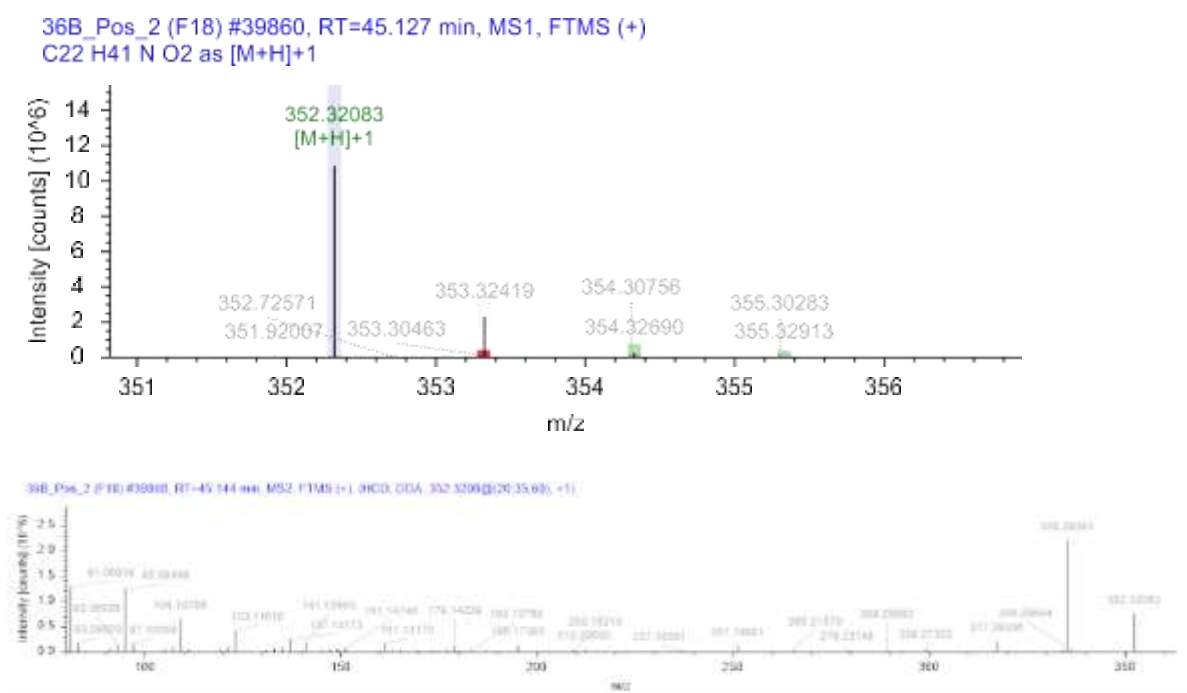

**Figure S14:** Retention time peak, and fragmentation pattern of Unknown compound (not identified with library)

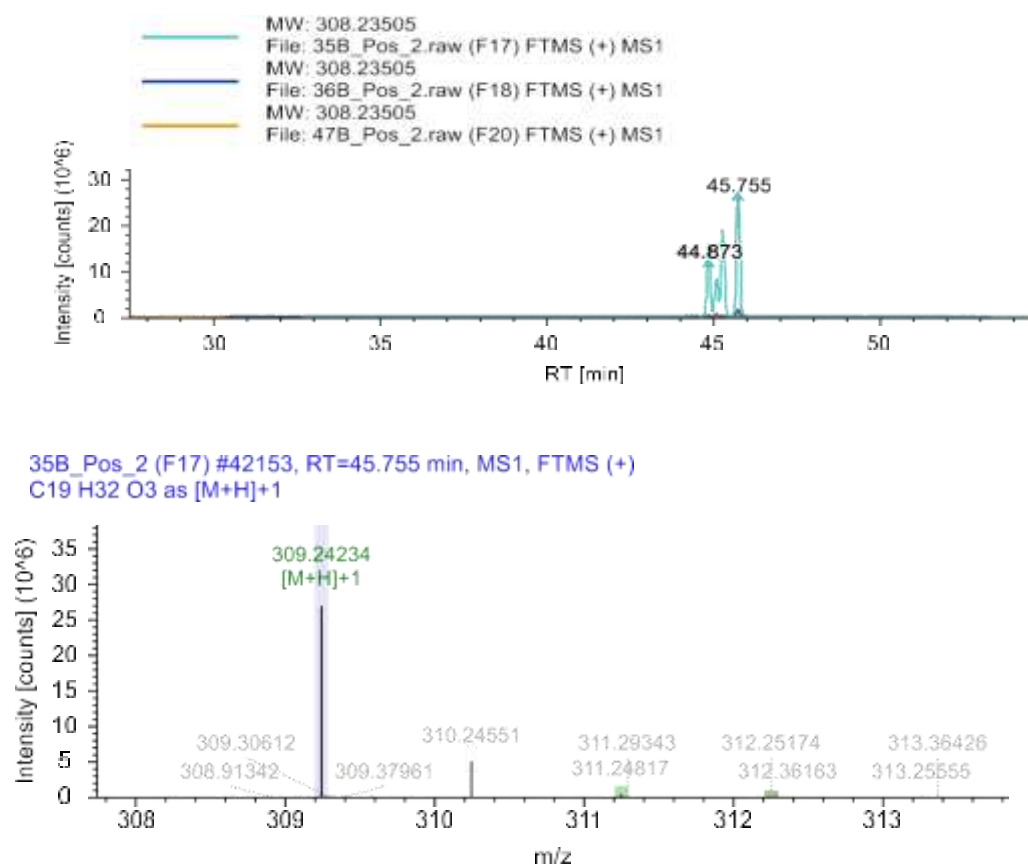



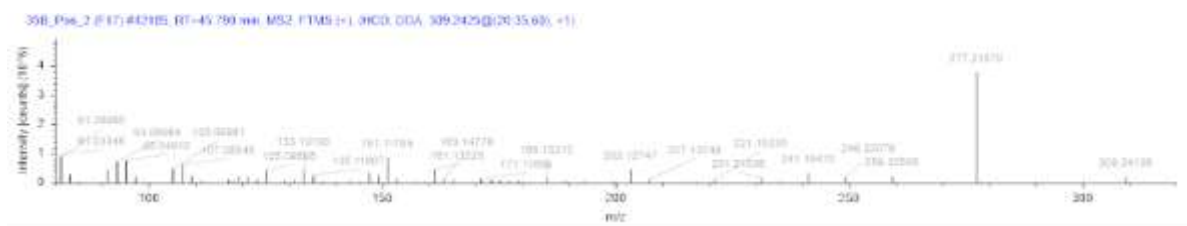

**Figure S15:** Retention time peak, and fragmentation pattern of Unknown compound (not identified with library)

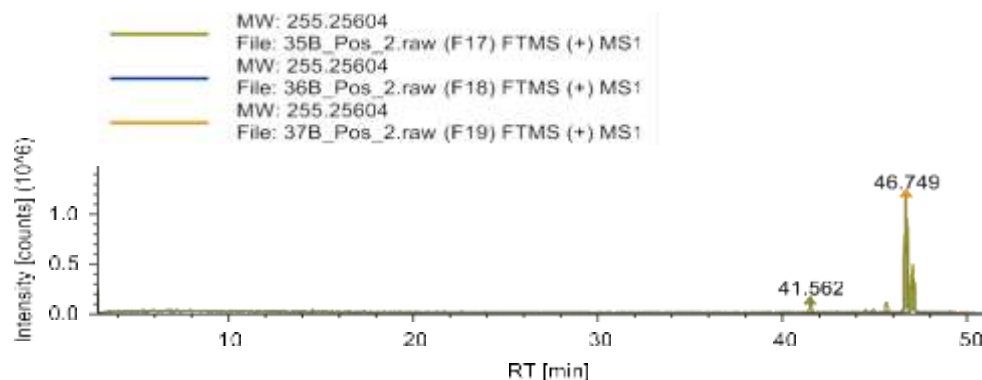

37B\_Pos\_2 (F19) #39144, RT=46.749 min, MS1, FTMS (+)  
C16 H33 N O as [M+H]<sup>+</sup>1

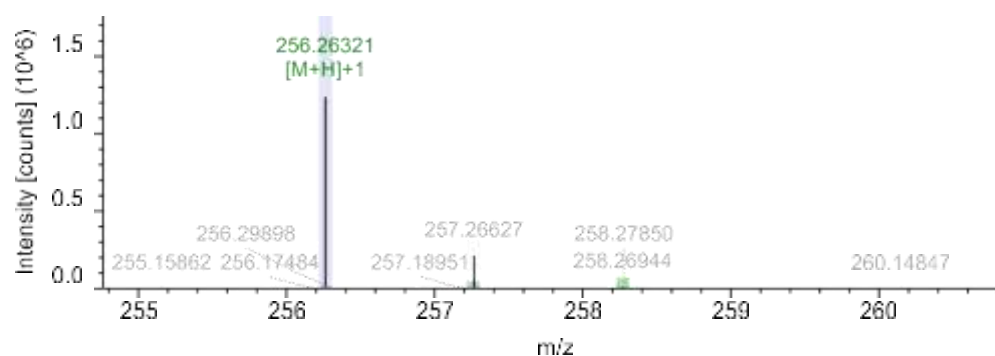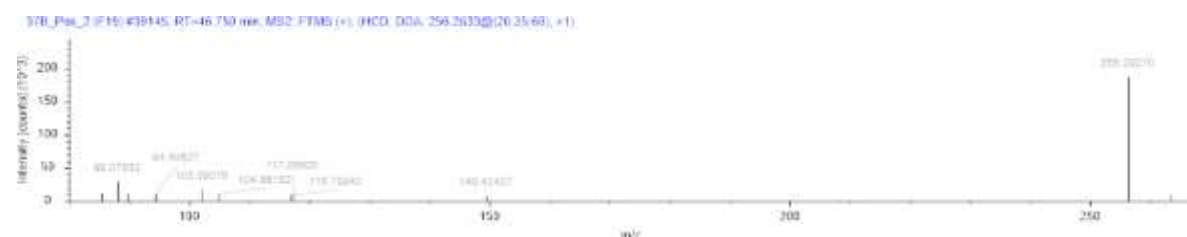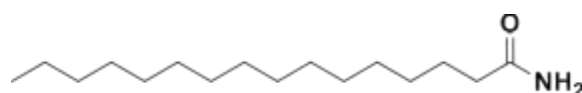

**Figure S16:** Retention time peak, fragmentation pattern and chemical structure of Hexadecanamide

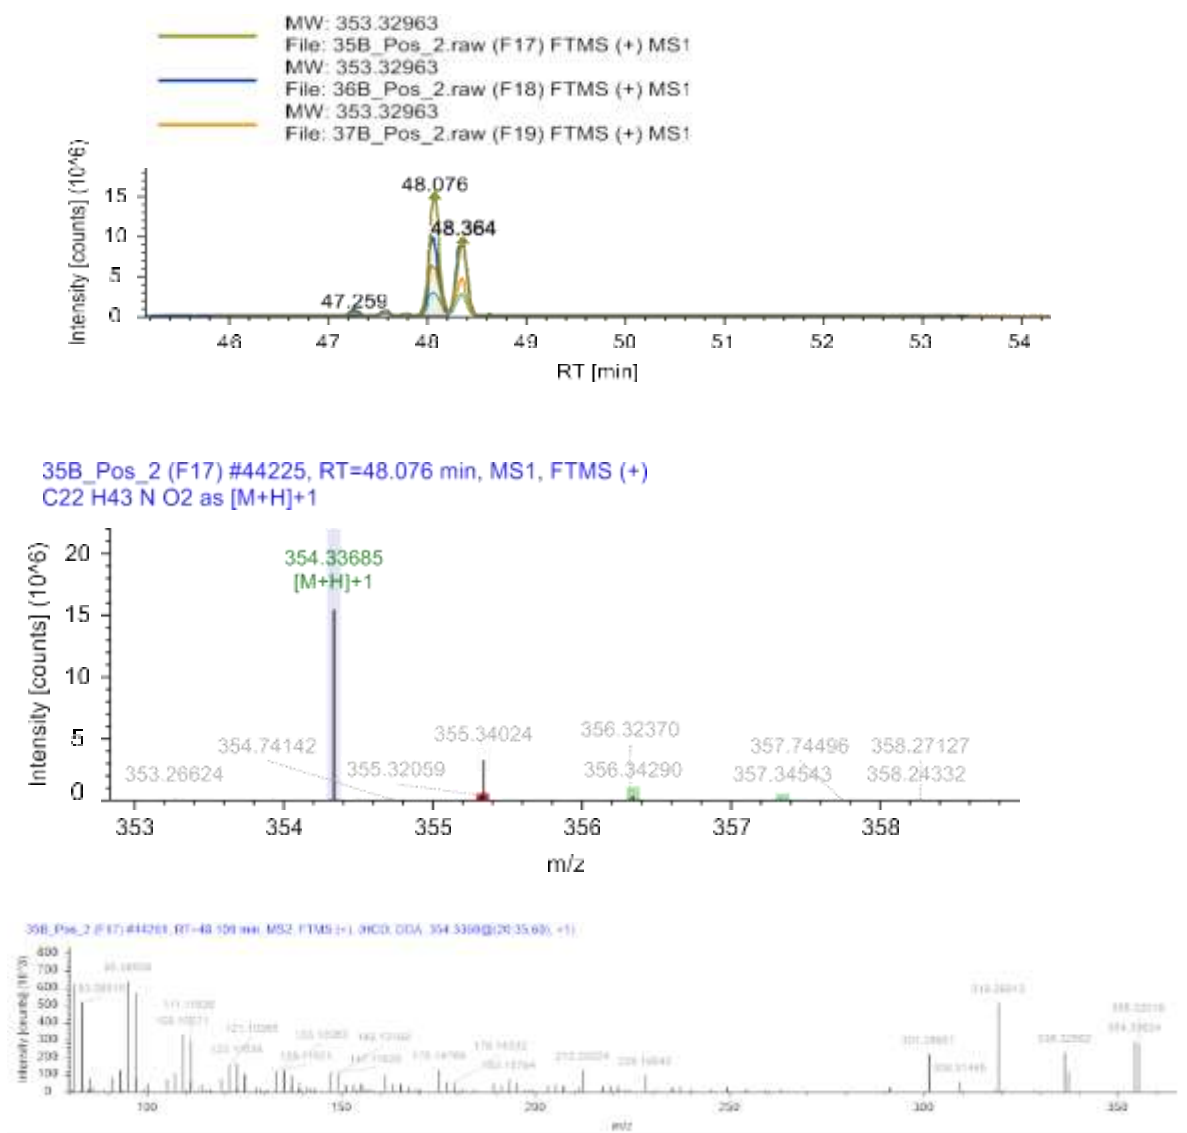

**Figure S17:** Retention time peak, fragmentation pattern and chemical structure of Unknown compound (not identified with library)

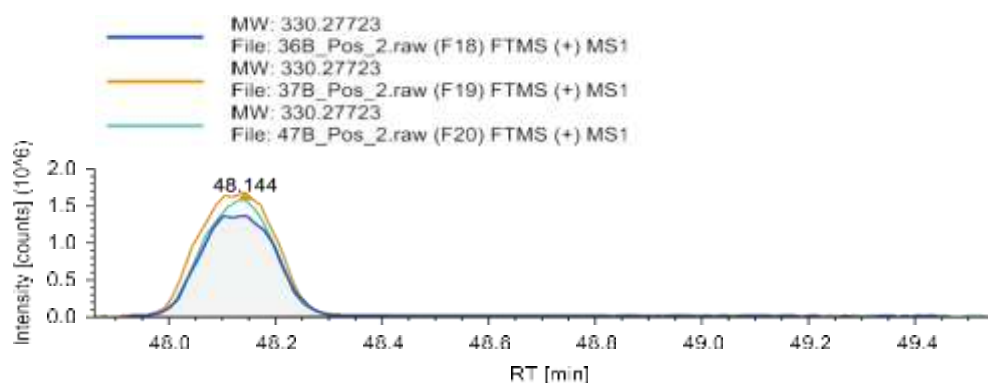

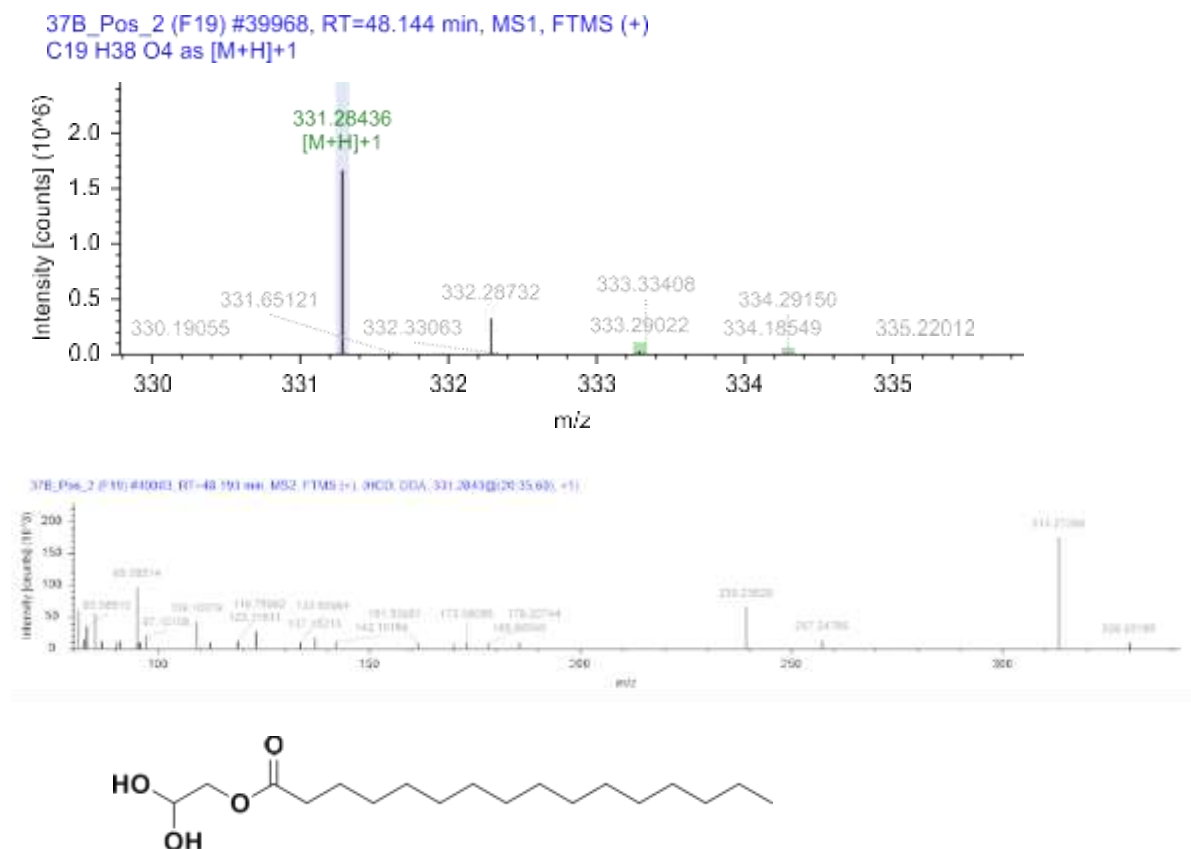

**Figure S18:** Retention time peak, fragmentation pattern and chemical structure of 1-Palmitoylglycerol

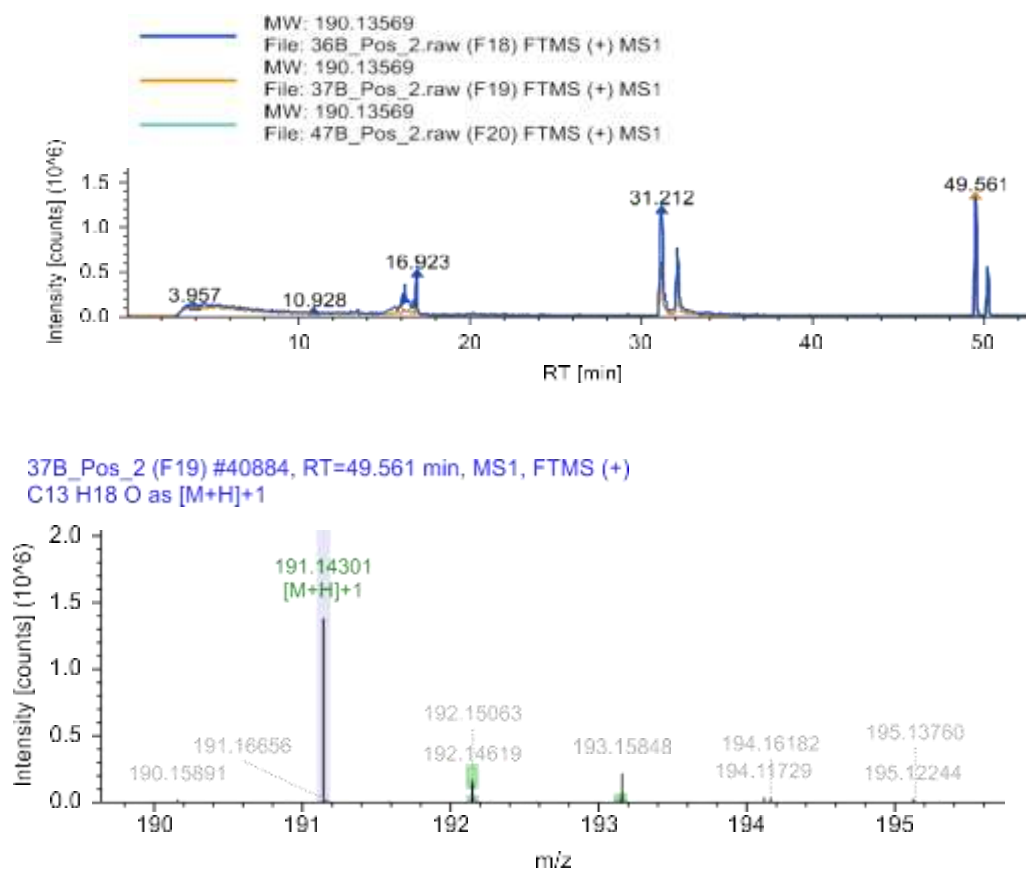

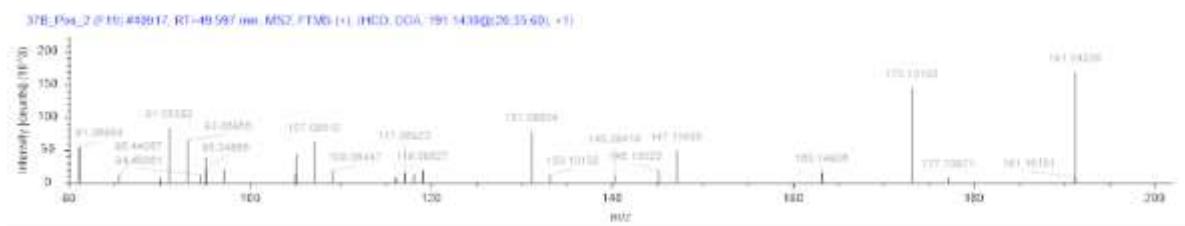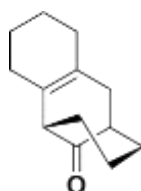

**Figure S19:** Retention time peak, fragmentation pattern and chemical structure of (1S)-Tricyclo[7.3.1.0~2,7~]tridec-2(7)-en-13-one

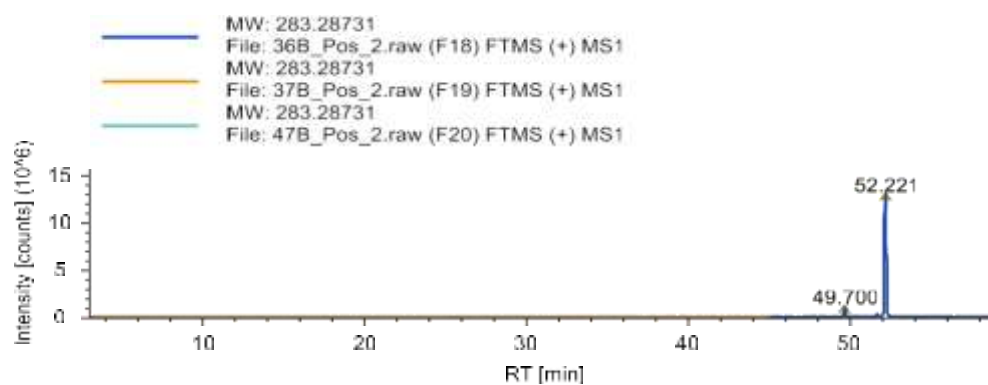

37B\_Pos\_2 (F19) #41008, RT=49.700 min, MS1, FTMS (+)  
C18 H37 N O as [M+H]<sup>+</sup>1

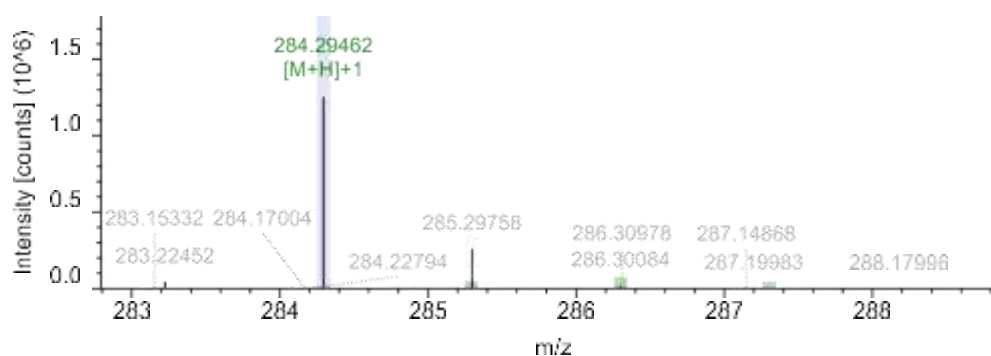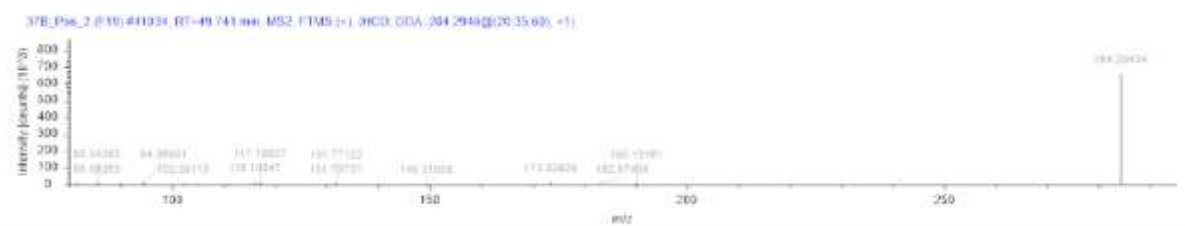

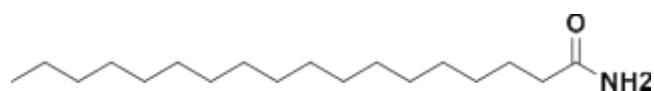

**Figure S20:** Retention time peak, fragmentation pattern and chemical structure of Stearamide

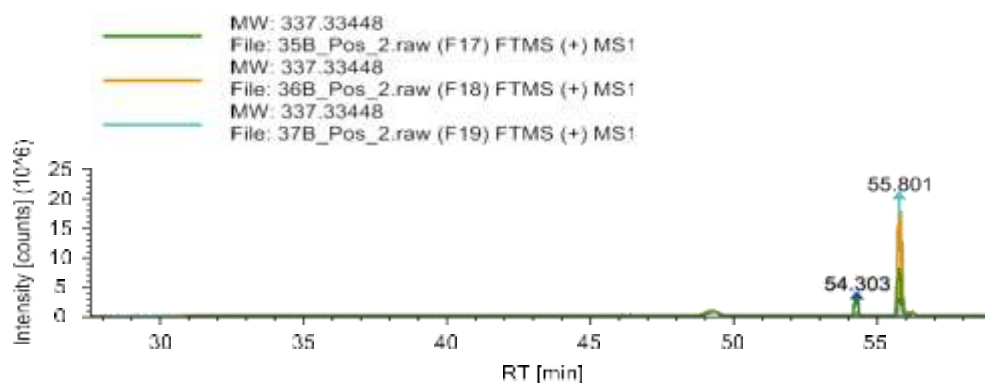

37B\_Pos\_2 (F19) #44952, RT=55.801 min, MS1, FTMS (+)  
C<sub>22</sub>H<sub>43</sub>N O as [M+H]<sup>+</sup>1

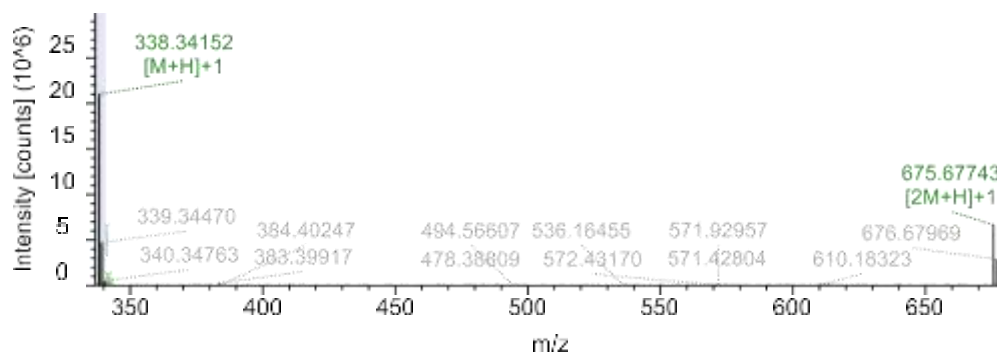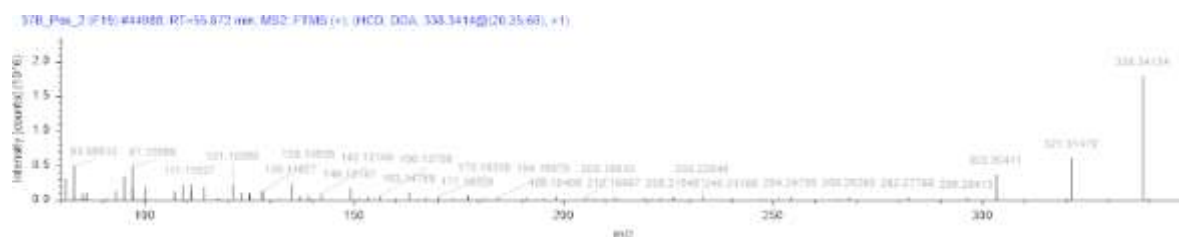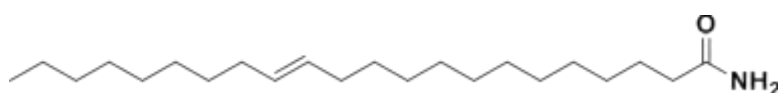

**Figure S21:** Retention time peak, fragmentation pattern and chemical structure of Erucamide

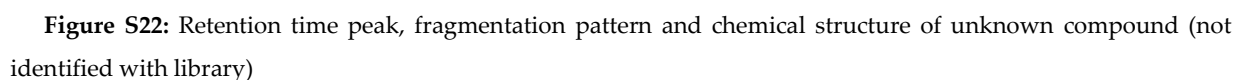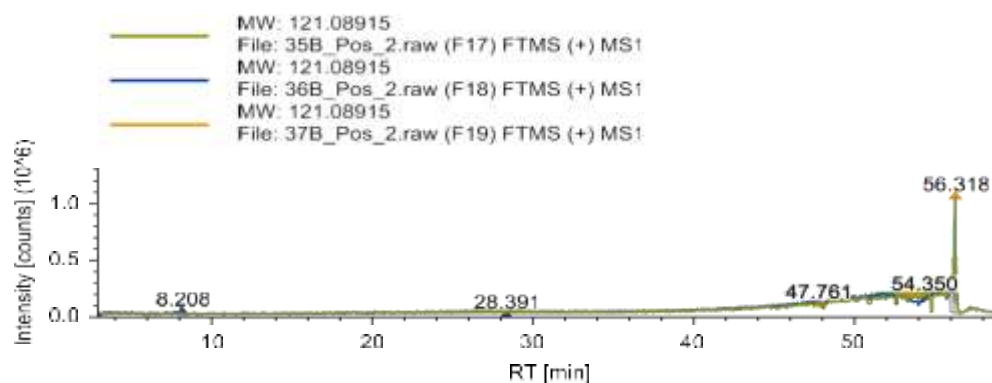

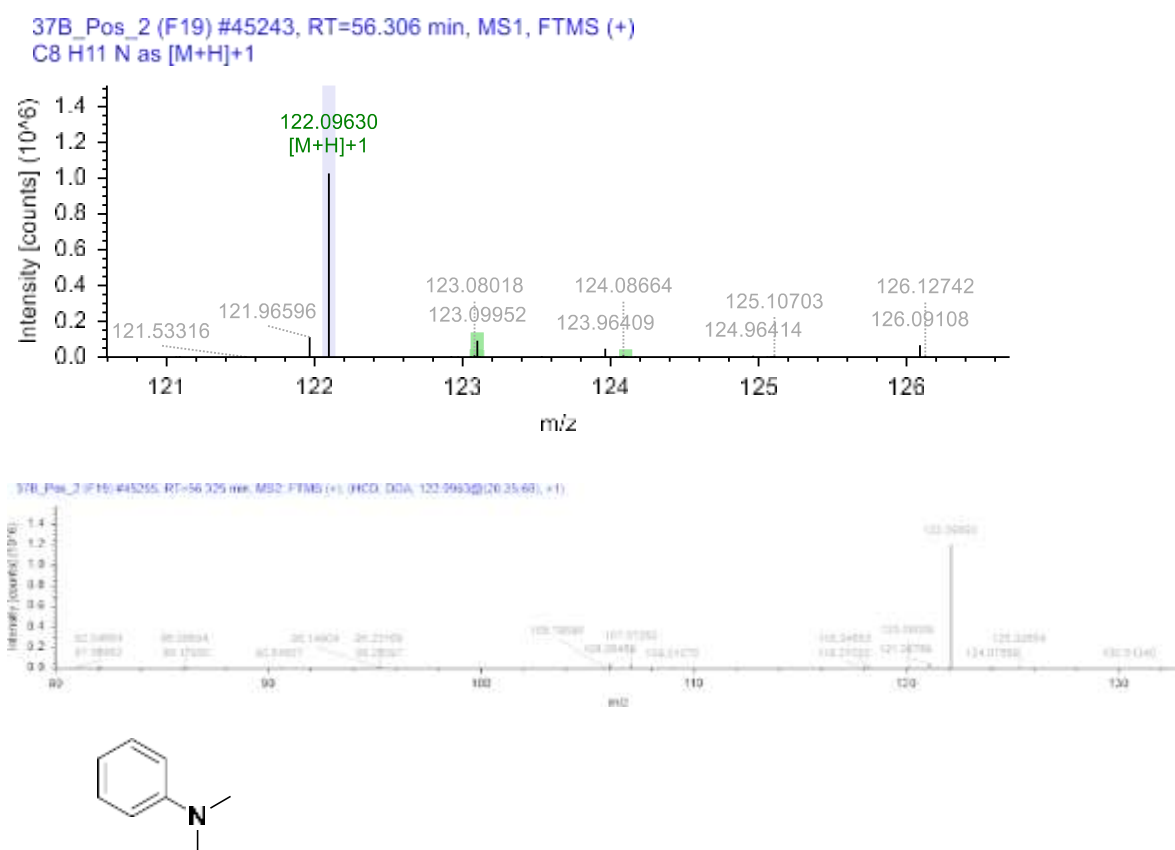

**Figure S23:** Retention time peak, fragmentation pattern and chemical structure of N,N-Dimethylaniline
